1 **Creation of an Expert Curated Variant List for Clinical Genomic Test Development and Validation: A ClinGen**  
2 **and GeT-RM Collaborative Project**

3 **Short Running Title (40 characters): Creation of a Curated Variant List**

4 Emma Wilcox<sup>1\*</sup>, Steven M. Harrison<sup>1\*</sup>, Edward Lockhart<sup>2</sup>, Karl Voelkerding<sup>3</sup>, Ira M. Lubin<sup>4</sup>, ClinGen Expert  
5 Panels<sup>5</sup> Heidi L. Rehm<sup>1,6^</sup>, Lisa Kalman<sup>7^</sup>, Birgit Funke<sup>8^</sup>

6 \*, ^ these authors contributed equally

7 <sup>1</sup>Program in Medical and Population Genetics, Broad Institute of MIT and Harvard, Cambridge, MA  
8 ([ewilcox@broadinstitute.org](mailto:ewilcox@broadinstitute.org), [sharriso@broadinstitute.org](mailto:sharriso@broadinstitute.org), [hrehm@broadinstitute.org](mailto:hrehm@broadinstitute.org))

9 <sup>2</sup>Informatics and Data Science Branch, Division of Laboratory Systems, Centers for Disease Control and  
10 Prevention, Atlanta, GA [coy3@cdc.gov](mailto:coy3@cdc.gov)

11 <sup>3</sup>Voelkerding Consulting, Salt Lake City, UT

12 <sup>4</sup>Quality and Safety Systems Branch, Division of Laboratory Systems, Centers for Disease Control and Prevention,  
13 Atlanta, GA [iblo@cdc.gov](mailto:iblo@cdc.gov)

14 <sup>5</sup>See Supplemental Table 1

15 <sup>6</sup>Center for Genomic Medicine, Massachusetts General Hospital, Boston, MA

16 <sup>7</sup>Informatics and Data Science Branch, Division of Laboratory Systems, Centers for Disease Control and  
17 Prevention, Atlanta, GA [LJK0@cdc.gov](mailto:LJK0@cdc.gov)

18 <sup>8</sup>Division of Genomic Health, Sema4, Stamford, CT

19

20 **Corresponding Author:**

21 Lisa Kalman, PhD  
22 Informatics and Data Science Branch  
23 Division of Laboratory Systems  
24 Office of Surveillance, Epidemiology, and Laboratory Services  
25 Centers for Disease Control and Prevention  
26 1600 Clifton Road  
27 Mailstop V24-3  
28 Atlanta, GA 30333  
29 (404) 498-2231  
30 [LKalman@cdc.gov](mailto:LKalman@cdc.gov)  
31

32 **Disclosures:**

33 The findings and conclusions in this report are those of the authors and do not necessarily represent the official  
34 position of the Centers for Disease Control and Prevention/the Agency for Toxic Substances and Disease Registry  
35 or the National Institutes of Health. Use of trade names and commercial sources is for identification only and  
36 does not imply endorsement by the Centers for Disease Control and Prevention, the Public Health Service, the  
37 US Department of Health and Human Services or the National Institutes of Health.

38

39 **Acknowledgements:**

40 ClinGen is primarily funded by the National Human Genome Research Institute (NHGRI), through the following  
41 three grants: U41HG006834, U41HG009649, U41HG009650. ClinGen also receives support for content curation  
42 from the Eunice Kennedy Shriver National Institute of Child Health and Human Development (NICHD), through  
43 the following three grants: U24HD093483, U24HD093486, U24HD093487.  
44

#### 45 **Abstract (220 words max)**

46 Modern genomic sequencing tests often interrogate large numbers of genes. Identification of appropriate  
47 reference materials for development, validation studies, and quality assurance of these tests poses a significant  
48 challenge for laboratories. It is difficult to develop and maintain expert knowledge to identify all variants that  
49 must be validated to assure analytic and clinical validity. Additionally, it is usually not possible to procure  
50 appropriate and characterized genomic DNA reference materials containing the number and scope of variants  
51 required. To address these challenges, the Centers for Disease Control and Prevention's Genetic Testing  
52 Reference Material Program (GeT-RM) has partnered with the Clinical Genome Resource (ClinGen) to develop a  
53 publicly available list of expert curated, clinically important variants. ClinGen Variant Curation Expert Panels  
54 nominated 546 variants found in 84 disease associated genes, including common pathogenic and difficult to  
55 detect variants. Variant types nominated included 346 SNVs, 104 deletions, 37 CNVs, 25 duplications, 18  
56 deletion-insertions, 5 inversions, 4 insertions, 2 complex rearrangements, 3 in difficult to sequence regions, and  
57 2 fusions. This expert-curated variant list is a resource that provides a foundation for designing comprehensive  
58 validation studies and for creating *in silico* reference materials for clinical genomic test development and  
59 validation.  
60

#### 61 **Introduction**

62 Genetic testing has evolved from interrogating small sets of known, pathogenic variants in one or a few genes  
63 using targeted genotyping assays or Sanger sequencing to examining hundreds or thousands of genes at a time  
64 using next generation sequencing (NGS). Large gene panels are now the norm in many clinical areas, such as  
65 hereditary cancer and cardiomyopathy, and are particularly useful for disorders with locus and allelic

66 heterogeneity. Offerings from molecular testing laboratories range from single disorder to multi-disorder  
67 panels, the latter often allowing molecular refinement of the initial clinical diagnosis (National Institutes of  
68 Health, Genetic Testing Registry <https://www.ncbi.nlm.nih.gov/gtr/> accessed 5/6/2021).

69  
70 While NGS has advanced many aspects of genetic testing, this technology has made the task of designing and  
71 developing analytically and clinically valid tests more complex. This process requires deep clinical and genetic  
72 expertise to understand the clinically relevant variant spectrum, and characterization of genomic context as high  
73 GC content, highly homologous genes, or repetitive sequences pose challenges for most current NGS  
74 technologies.<sup>1, 2</sup> When examining only one or a few well-studied genes, sufficient expertise to identify clinically  
75 important variants can be developed easily, but this aspect of test design and development does not scale to  
76 assays that examine hundreds or thousands of genes.<sup>3</sup> Laboratories often cannot procure reference materials  
77 (RMs) that encompass the scope of variants and variant types needed for NGS test development and validation  
78 because the supply of available characterized genomic DNA samples from cell lines or patient samples is limited  
79 and does not cover the range of genes and variants often included in NGS assays. Finally, traditional patient  
80 derived RMs, such as genomic DNA from cell lines, typically contain only 1 or 2 clinically important variants per  
81 sample, which can significantly increase the number of samples needed, and thus the complexity and cost of a  
82 validation study when large numbers of variants need to be addressed.

83  
84 Proper analytical validation of genomic tests and large test panels requires a combination of approaches: To  
85 ensure optimal confidence in the ability of a given technology to detect variants within a genome or subregion  
86 (e.g., exon), large numbers of variants for each clinically relevant type (SNVs, insertions, deletions, SVs) need to  
87 be analyzed. In addition, test developers should demonstrate the test's ability to detect specific clinically  
88 important variants particularly when they are technically challenging (Food and Drug Administration  
89 <https://www.fda.gov/media/99208/download>, accessed 3/23/2021; College of American Pathologists,

90 Molecular Pathology 2020 checklist <https://www.cap.org/> registration required, accessed 3/23/2021).<sup>4</sup>

91 Different types of reference materials have been created to meet these needs.

92

93 The 1000 Genomes project HapMap samples (1000 Genomes Project

94 <https://www.internationalgenome.org/home>; accessed 10/11/2020) were the first generation of characterized

95 genomes that were publicly available. More recently, the National Institute for Standards and Technology (NIST)

96 Genome in a Bottle project has characterized 7 publicly available genomes including NA12878 and two

97 son/mother/father trios of Ashkenazi Jewish and Han Chinese ancestry for use as reference materials (NIST

98 <https://www.nist.gov/programs-projects/genome-bottle> accessed 5/10/2021).<sup>5,6</sup> These samples have been

99 extensively characterized using a number of different technologies and variant calling methods covering over

100 90% of the genome. NIST has generated publicly available, high confidence benchmarking data sets that have

101 been widely used by the clinical testing community and are now also covering structural variants, and variants in

102 highly homologous regions.<sup>7</sup> In addition, Illumina produced a set of over 4.7 million phased variants from 17

103 samples of a large multigenerational pedigree.<sup>8</sup> These data sets are excellent resources for establishing general

104 analytical performance across various variant types, but do not meet the additional need to validate specific

105 clinically important variants. Other publicly available genomic DNA samples, such as those characterized by the

106 Center for Disease Control and Prevention's Genetic Testing Reference Material Program (GeT-RM

107 <https://www.cdc.gov/labquality/get-rm/index.html> accessed 10/11/2020) and samples available from

108 repositories such as Coriell Institute for Medical Research (Coriell <https://www.coriell.org/> accessed 5/10/2021)

109 or the American Type Culture Collection (ATCC) (ATCC <https://www.atcc.org/> accessed 5/10/2021) have

110 identified variants in some, but not all genes likely to be included in NGS tests. Although useful, none of these

111 genomic DNA samples, individually or as a group, are sufficient to represent the wide range of variants needed

112 for a thorough and comprehensive validation of an NGS assay.

113

114 As NGS tests have grown to include hundreds to thousands of genes, it has become technically and economically  
115 impractical to rely exclusively on DNA samples for assay development and validation studies to assess assay  
116 performance. Procuring sufficient reference materials containing specific variants has always been challenging  
117 and can be virtually impossible for large gene panels, particularly those that span multiple disorders. In addition,  
118 the commoditization of genomic testing and the availability of “off-the-shelf” gene panels have facilitated  
119 implementation of genomic tests. Well established laboratories with longstanding clinical expertise often have  
120 archived DNA which can be used as reference materials for test development. In contrast, laboratories that do  
121 not already have in-depth expertise in the genomic profile of the disorders included in the panels are faced with  
122 a paucity of organized resources and guidance as to which clinically important variants require specific attention  
123 during test development. The FDA and professional organizations including the College of American Pathologists  
124 have begun to acknowledge these challenges and have responded with guidance that permits use of *in silico*  
125 reference materials to supplement clinical test validation and operation (Food and Drug Administration  
126 <https://www.fda.gov/media/99208/download>, accessed 3/23/2021; College of American Pathologists,  
127 Molecular Pathology 2020 checklist <https://www.cap.org/> registration required, accessed 3/23/2021).

128

129 In 2019, the Clinical Laboratory Improvement Advisory Committee (CLIAC) issued a recommendation to the  
130 Department of Health and Human Services that the GeT-RM program should develop electronic reference  
131 materials for NGS testing ([https://www.cdc.gov/cliac/docs/summary/cliac0419\\_summary.pdf](https://www.cdc.gov/cliac/docs/summary/cliac0419_summary.pdf) accessed  
132 [5/10/2021](https://www.cdc.gov/cliac/docs/summary/cliac0419_summary.pdf)). As a first step towards this goal, GeT-RM has partnered with the Clinical Genome Resource  
133 (ClinGen, <https://www.clinicalgenome.org/> accessed 2/27/2021) to develop lists of expert curated, clinically  
134 important variants. This publication describes these variant lists, which can be used to inform test validation  
135 studies and will serve as a foundation for creating multi-variant electronic reference materials by *in silico*  
136 mutagenesis of laboratory generated BAM or FASTQ files.<sup>9-11</sup>

137

138

139 **Methods**

140 Variant nomination process

141 Members of 36 expert panels, including 35 of ClinGen’s Variant Curation Expert Panels (VCEPs), and experts  
142 from the CFTR2 Project were contacted in March 2020 and asked to nominate clinically important variants in the  
143 genes covered by the expert panels. FDA has recognized ClinGen’s curation process and its resulting variant  
144 classifications as a regulatory-grade variant database (ClinGen [https://clinicalgenome.org/docs/fda-recognizes-  
145 clingen-assertions-in-clinvar-frequently-asked-questions/](https://clinicalgenome.org/docs/fda-recognizes-clingen-assertions-in-clinvar-frequently-asked-questions/) accessed 5/10/2021; Food and Drug Administration  
146 [https://www.fda.gov/news-events/press-announcements/fda-takes-new-action-advance-development-reliable-  
147 and-beneficial-genetic-tests-can-improve-patient](https://www.fda.gov/news-events/press-announcements/fda-takes-new-action-advance-development-reliable-and-beneficial-genetic-tests-can-improve-patient) accessed 5/10/2021). These VCEP curated, FDA recognized  
148 variants are available via NCBI’s ClinVar database and ClinGen’s Evidence Repository  
149 (<https://erepo.clinicalgenome.org> accessed 5/10/2021).

150

151 Each expert panel was asked to nominate a minimum of 10 variants per disease area, including pathogenic  
152 variants that are the largest contributors to a disease as well as variants that may represent potential analytic  
153 challenges to laboratories. Panels submitted their variant nominations on a standardized template from April-  
154 June 2020. For each variant, the panels noted if the basis for inclusion was: a) Major contributor to disease, b)  
155 Analytic detection difficult, c) Filtration impact (may be inadvertently filtered out due to high allele frequency),  
156 or d) Other (with explanation provided in a comment box). The panels were instructed that any reason for  
157 difficult detection was appropriate including: variant type, homology issues or a high allele frequency for a lower  
158 penetrant variant that might make the variant excluded by standard allele frequency filters. The ClinGen Allele  
159 Registry was used to standardize nomenclature for all nominated variants and ClinVar Variation IDs and  
160 associated disorders were added where available. A full list of the expert panels that contributed variants can be  
161 found in Supplemental Table 1 and the full list of nominated variants can be found in Supplemental Table 2.

162

163 Not all of the ClinGen VCEPs that participated in this project have completed all four steps of the VCEP  
164 development process required for final approval by ClinGen<sup>12</sup> (ClinGen  
165 <https://clinicalgenome.org/docs/guidelines-for-applying-for-variant-or-gene-curation-expert-panel-status/>  
166 accessed 3/23/2021). Of the variants submitted by the panels, 38% are from expert panels with final ClinGen  
167 approval to submit to ClinVar as ‘reviewed by expert panel’, whereas 62% are from ClinGen VCEPs that were still  
168 developing disease specifications for variant classification and were not yet fully ClinGen-approved at the time  
169 of submission of variants to the project. VCEP status at the time of manuscript submission is shown in column B  
170 of Supplemental table 2. Current status can be found on the ClinGen website  
171 (<https://clinicalgenome.org/working-groups/clinical-domain/> accessed 3/23/2021).

172

### 173 Limitations of variant selection process

174 Several limitations of the variant selection process should be noted. There were no explicit requirements given  
175 to the expert panels in terms of the definitions of categories a, b, and c and therefore each may have used  
176 slightly different definitions to select variants to nominate for this project. In addition, some expert panels may  
177 have used laboratory data that is not in the public domain to identify nominated variants and this information  
178 was not requested during the submission process. Furthermore, some expert panels represent genes and  
179 diseases that are very rare and therefore variants may not, in general, be highly prevalent. These are not  
180 considered serious limitations as these are “first-generation” variant lists, which provide an entirely new  
181 resource. It is expected that this effort will continue in years to come to broaden and deepen this resource.

182

### 183 **Results**

184 Nominations of clinically important pathogenic or difficult to detect variants were received from 24 expert  
185 panels out of 36 contacted (Supplemental Table 1). Overall, 546 unique variants in 84 genes were nominated  
186 (Supplemental Table 2) including 22 of the 59 genes recommended by ACMG for reporting of incidental or

187 secondary findings, which are included as part of virtually all proactive genomic health tests.<sup>12</sup> The nominated  
188 variants are causative for a wide range of diseases many of which are commonly tested by NGS including  
189 heritable cancers, inborn errors of metabolism, cardiomyopathy, diabetes, and immune disorders (Table 1). A  
190 number of different variant types were nominated, including 346 SNVs, 104 deletions, 37 CNVs, 25 duplications,  
191 18 deletion-insertions, 5 inversions, 4 insertions, 2 complex rearrangements, 2 fusions, and 3 variants in regions  
192 defined as “difficult region to cover and map variants”. The variants were nominated for a variety of reasons:  
193 355 are major contributors to disease, 111 are analytically difficult to detect, 28 may have filtration impacts (be  
194 inadvertently filtered out due to high allele frequency), 6 had multiple reasons for inclusion, and 46 were listed  
195 as “other” or no explanation was provided (Supplemental Table 2).

196

## 197 **Discussion**

198 Clinical laboratories in the United States are required by regulation and guided by professional or best practice  
199 standards to use characterized reference materials for test development, validation and verification studies,  
200 quality control and proficiency testing<sup>13-16</sup> (American College of Medical Genetics  
201 <https://www.acmg.net/PDFLibrary/Standards-Guidelines-Clinical-Molecular-Genetics.pdf>, accessed 4/9/2020,  
202 Washington State Legislature, <http://app.leg.wa.gov/WAC/default.aspx?cite=246-338-090>, accessed 4/9/2020,  
203 College of American Pathologists <https://www.cap.org/>, accessed 4/9/2020 (registration required), New York  
204 State Clinical Laboratory Evaluation Program, <http://www.wadsworth.org/clep>, accessed 4/9/2020).

205

206 Certain aspects of test development and validation, such as DNA extraction, library preparation, and sequence  
207 generation will always require the use of genomic DNA from cell lines or patient samples. However, given the  
208 scope of many NGS tests, it is no longer feasible to rely solely upon genomic DNA samples containing only one or  
209 a few variants of interest to validate an assay that tests an entire exome or genome or many genes within a  
210 large NGS panel, and novel types of reference materials are needed to enable assessment of a test’s analytical  
211 validity and establish adequate clinical validity.



212

213 The Association for Molecular Pathology and the College of American Pathologists allow the use of *in silico*  
214 reference materials to supplement genomic DNA for the validation of bioinformatic pipelines (College of  
215 American Pathologists, Molecular Pathology 2020 checklist <https://www.cap.org/> registration required,  
216 accessed 3/23/2021).<sup>4, 17-19</sup> Specialized software<sup>9, 10, 20</sup> has been developed to edit sequence variants into BAM  
217 or FASTQ files generated by the assay being validated to create customized reference materials. The software is  
218 publicly available, and several companies offer this service to laboratories. The GeT-RM program is planning to  
219 use these curated variants and file editing software to pilot development and use of *in silico* reference materials  
220 in clinical laboratories.

221

222 The number of variants that can be added is potentially unlimited, but care must be taken to avoid adding too  
223 many variants in *cis* to the same sequence reads because it may affect alignment to the reference sequence. The  
224 types of variants that can be introduced remains limited to SNVs and smaller insertions and deletions at  
225 different allele fractions, although the ability to introduce CNVs is currently being developed. This approach has  
226 been used successfully by the College of American Pathologists for its NGS proficiency testing challenges.<sup>9, 10</sup>

227

228 The variant list developed by the effort presented here is available on the GeT-RM and ClinGen websites and can  
229 serve as a knowledge resource to help laboratories identify important pathogenic and difficult to detect variants  
230 in genes that are included in their assays, as well as a foundation for generating customized *in silico* reference  
231 materials. GeT-RM and ClinGen will continue to collaborate to add to the current variant list and invite input  
232 from the genetics community about this list and the processes used to generate it.

233

234

235

236

237 **Table 1.** Summary of the numbers of variants per gene nominated

| <b>Gene</b> | <b>HGNC Gene ID</b> | <b># Variants<br/>nominated</b> | <b>Disorder</b>                                                                 |
|-------------|---------------------|---------------------------------|---------------------------------------------------------------------------------|
| ACADVL      | HGNC:92             | 10                              | Very long-chain acyl-CoA dehydrogenase deficiency                               |
| ACVRL1      | HGNC:175            | 3                               | Hereditary hemorrhagic telangiectasia, type 2                                   |
| APC         | HGNC:583            | 4                               | Familial adenomatous polyposis                                                  |
| ATM         | HGNC:795            | 6                               | Hereditary breast carcinoma (AD)<br><br>Ataxia telangiectasia (AR)              |
| BARD1       | HGNC:952            | 5                               | Hereditary breast carcinoma                                                     |
| BRAF        | HGNC:1097           | 1                               | Cardiofaciocutaneous syndrome                                                   |
| BRCA1       | HGNC:1100           | 26                              | Breast-ovarian cancer, familial, susceptibility to, 1 (AD)                      |
| BRCA2       | HGNC:1101           | 22                              | Breast-ovarian cancer, familial, susceptibility to, 2 (AD)                      |
| BRIP1       | HGNC:20473          | 5                               | Familial ovarian cancer (AD)<br><br>Fanconi anemia complementation group J (AR) |
| BTK         | HGNC:1133           | 10                              | X-linked agammaglobulinemia (XLA)                                               |
| CARD11      | HGNC:16393          | 5                               | CARD11 defects                                                                  |
| CDH1        | HGNC:1748           | 10                              | Hereditary diffuse gastric adenocarcinoma                                       |

|         |            |    |                                                                                 |
|---------|------------|----|---------------------------------------------------------------------------------|
| CFH     | HGNC:4883  | 5  | Atypical hemolytic uremic syndrome (aHUS)/Thrombotic microangiopathy (TMA)      |
| CFTR    | HGNC:1884  | 14 | Cystic fibrosis                                                                 |
| CHEK2   | HGNC:16627 | 5  | Hereditary breast carcinoma                                                     |
| COL6A1  | HGNC:2211  | 1  | Congenital muscular dystrophy                                                   |
| CYP1B1  | HGNC:2597  | 3  | Congenital glaucoma                                                             |
| DCLRE1C | HGNC:17642 | 8  | Severe combined immunodeficiency due to DCLRE1C deficiency                      |
| DES     | HGNC:2770  | 17 | Arrhythmogenic right ventricular cardiomyopathy (arrhythmogenic cardiomyopathy) |
| DICER1  | HGNC:17098 | 7  | Pleuropulmonary blastoma                                                        |
| DNM2    | HGNC:2974  | 3  | Centronuclear myopathy                                                          |
| DSC2    | HGNC:3036  | 5  | Arrhythmogenic right ventricular cardiomyopathy (arrhythmogenic cardiomyopathy) |
| DSG2    | HGNC:3049  | 7  | Arrhythmogenic right ventricular cardiomyopathy (arrhythmogenic cardiomyopathy) |
| DSP     | HGNC:3052  | 10 | Arrhythmogenic right ventricular cardiomyopathy (arrhythmogenic cardiomyopathy) |

|       |           |    |                                                                                                                                                                                                                                                                                                                                                                                                                                                                                     |
|-------|-----------|----|-------------------------------------------------------------------------------------------------------------------------------------------------------------------------------------------------------------------------------------------------------------------------------------------------------------------------------------------------------------------------------------------------------------------------------------------------------------------------------------|
| ENG   | HGNC:3349 | 4  | Hereditary hemorrhagic telangiectasia                                                                                                                                                                                                                                                                                                                                                                                                                                               |
| FBN1  | HGNC:3603 | 10 | Marfan syndrome, familial thoracic aortic aneurysm and aortic dissection                                                                                                                                                                                                                                                                                                                                                                                                            |
| GAA   | HGNC:4065 | 8  | Glycogen storage disease type II                                                                                                                                                                                                                                                                                                                                                                                                                                                    |
| GATA2 | HGNC:4171 | 15 | GATA2 deficiency with susceptibility to MDS/AML; GATA2 haploinsufficiency                                                                                                                                                                                                                                                                                                                                                                                                           |
| GCK   | HGNC:4195 | 11 | Monogenic diabetes                                                                                                                                                                                                                                                                                                                                                                                                                                                                  |
| HBA1* | HGNC:4823 | 4  | Alpha thalassemia, Hemoglobin H disease, Hemoglobin Bart's hydrops fetalis                                                                                                                                                                                                                                                                                                                                                                                                          |
| HBA2* | HGNC:4824 | 7  | Alpha thalassemia, Hemoglobin H disease, Hemoglobin Bart's hydrops fetalis                                                                                                                                                                                                                                                                                                                                                                                                          |
| HBB*  | HGNC:4827 | 10 | Sickle cell anemia, sickle cell disease associated with another hemoglobin anomaly, Beta thalassemia, Sickle cell-beta-thalassemia disease syndrome, Sickle cell-hemoglobin C disease syndrome, Hemoglobin C-beta-thalassemia syndrome, Hemoglobin C disease, Sickle cell-hemoglobin D disease syndrome, Hemoglobin D disease, Sickle cell-hemoglobin E disease syndrome, Hemoglobin E-beta-thalassemia syndrome, Hemoglobin E disease, Hemoglobin Lepore-beta-thalassemia syndrome |

|        |            |    |                                                                                            |
|--------|------------|----|--------------------------------------------------------------------------------------------|
| HBD*   | HGNC:4829  | 1  | Hemoglobin Lepore-beta-thalassemia syndrome, sickle cell-beta-thalassemia disease syndrome |
| HBQ1   | HGNC:4833  | 1  | Alpha thalassemia, Hemoglobin H disease, Hemoglobin Bart's hydrops fetalis                 |
| HNF1A  | HGNC:11621 | 2  | Monogenic diabetes                                                                         |
| HNF1B  | HGNC:11630 | 1  | Monogenic diabetes                                                                         |
| HNF4A  | HGNC:5025  | 3  | Monogenic diabetes                                                                         |
| HRAS   | HGNC:5173  | 1  | Costello syndrome                                                                          |
| IKBKG  | HGNC:5961  | 6  | NEMO (NFkB essential modulator) deficiency                                                 |
| IL2RG  | HGNC:6010  | 10 | SCID (severe combined immunodeficiency)                                                    |
| INS    | HGNC:6081  | 1  | Monogenic diabetes                                                                         |
| JAK3   | HGNC:6193  | 5  | SCID (severe combined immunodeficiency)                                                    |
| LDLR   | HGNC:6547  | 10 | Familial hypercholesterolemia                                                              |
| LRBA   | HGNC:1742  | 5  | LRBA deficiency                                                                            |
| LYST   | HGNC:1968  | 5  | Chediak-Higashi syndrome (CHS)                                                             |
| MAP2K1 | HGNC:6840  | 1  | Cardiofaciocutaneous syndrome                                                              |
| MLH1   | HGNC:7127  | 19 | Colorectal cancer, hereditary nonpolyposis, type 2                                         |

|        |            |    |                                                                                 |
|--------|------------|----|---------------------------------------------------------------------------------|
|        |            |    | Constitutional mismatch repair deficiency syndrome                              |
| MSH2   | HGNC:7325  | 16 | Lynch syndrome                                                                  |
| MSH6   | HGNC:7329  | 7  | Lynch syndrome                                                                  |
| MUTYH  | HGNC:7527  | 2  | MUTYH-related attenuated familial adenomatous polyposis (AR/AD)                 |
| MYBPC3 | HGNC:7551  | 16 | Hypertrophic cardiomyopathy                                                     |
| MYH7   | HGNC:7577  | 6  | Hypertrophic cardiomyopathy                                                     |
| MYOC   | HGNC:7610  | 4  | Open angle glaucoma                                                             |
| NCF1   | HGNC:7660  | 6  | Chronic Granulomatous Disease (CGD)                                             |
| NEB    | HGNC:7720  | 2  | Nemaline myopathy                                                               |
| NTHL1  | HGNC:8028  | 1  | Familial adenomatous polyposis                                                  |
| PAH    | HGNC:8582  | 17 | Phenylketonuria                                                                 |
| PALB2  | HGNC:26144 | 5  | Hereditary breast carcinoma (AD), Fanconi anemia complementation group N (AR)   |
| PKP2   | HGNC:9024  | 22 | Arrhythmogenic right ventricular cardiomyopathy (arrhythmogenic cardiomyopathy) |
| PLN    | HGNC:9080  | 4  | Arrhythmogenic right ventricular cardiomyopathy (arrhythmogenic cardiomyopathy) |
| POLD1  | HGNC:9175  | 1  | Polymerase proofreading-related adenomatous polyposis                           |
| POLE   | HGNC:9177  | 1  | Polymerase proofreading-related adenomatous polyposis                           |

|         |            |    |                                                                                    |
|---------|------------|----|------------------------------------------------------------------------------------|
| PTEN    | HGNC:9588  | 5  | PTEN hamartoma tumor syndrome                                                      |
| PTPN11  | HGNC:9644  | 4  | Noonan syndrome, Noonan syndrome with multiple lentigines                          |
| RAD51C  | HGNC:9820  | 5  | Familial ovarian cancer (AD)                                                       |
| RAD51D  | HGNC:9823  | 5  | Familial ovarian cancer (AD)                                                       |
| RAF1    | HGNC:9829  | 1  | Noonan syndrome                                                                    |
| RAG1    | HGNC:9831  | 7  | SCID (severe combined immunodeficiency)                                            |
| RUNX1   | HGNC:10471 | 10 | Familial platelet disorder with associated myeloid malignancy                      |
| RYR1**  | HGNC:10483 | 17 | Susceptibility to malignant hyperthermia (AD)<br><br>Central core myopathy (AR/AD) |
| SELENON | HGNC:15999 | 4  | Rigid spine myopathy                                                               |
| SHOC2   | HGNC:15454 | 1  | Noonan syndrome-like disorder with loose anagen hair                               |
| SMAD4   | HGNC:6770  | 3  | Juvenile polyposis/hereditary hemorrhagic telangiectasia syndrome                  |
| SOS1    | HGNC:11187 | 1  | Noonan syndrome                                                                    |
| TMEM43  | HGNC:28472 | 1  | Arrhythmogenic right ventricular cardiomyopathy (arrhythmogenic cardiomyopathy)    |

|                                                                                                                        |            |    |                                                                                                   |
|------------------------------------------------------------------------------------------------------------------------|------------|----|---------------------------------------------------------------------------------------------------|
| TNNI3                                                                                                                  | HGNC:11947 | 1  | Hypertrophic cardiomyopathy                                                                       |
| TNNT2                                                                                                                  | HGNC:11949 | 2  | Hypertrophic cardiomyopathy, dilated cardiomyopathy                                               |
| TP53                                                                                                                   | HGNC:11998 | 10 | Li-Fraumeni syndrome                                                                              |
| TPM2                                                                                                                   | HGNC:12011 | 1  | Nemaline myopathy                                                                                 |
| TPM3                                                                                                                   | HGNC:12012 | 3  | Nemaline myopathy                                                                                 |
| TTN                                                                                                                    | HGNC:12403 | 7  | Distal titinopathy, tibial muscular dystrophy, hereditary myopathy with early respiratory failure |
| VHL                                                                                                                    | HGNC:12687 | 7  | Von Hippel-Lindau disease                                                                         |
| WAS                                                                                                                    | HGNC:12731 | 13 | Wiskott- Aldrich syndrome (WAS)                                                                   |
| WFS1                                                                                                                   | HGNC:12762 | 1  | Monogenic diabetes                                                                                |
| * Some variants in these genes are multi-gene deletions or fusions.                                                    |            |    |                                                                                                   |
| **One variant in RYR1 was submitted by both the Congenital Myopathies and Malignant Hyperthermia Susceptibility VCEPs. |            |    |                                                                                                   |

238

239 Suppl Table 1. List of participating expert panels and names of participants

240 Suppl Table 2. List of variants nominated

241

## 242 References

- 243 1. Mandelker D, Schmidt RJ, Ankala A, McDonald Gibson K, Bowser M, Sharma H, Duffy E, Hegde M,  
 244 Santani A, Lebo M, Funke B: Navigating highly homologous genes in a molecular diagnostic setting: a  
 245 resource for clinical next-generation sequencing. *Genetics in medicine : official journal of the American*  
 246 *College of Medical Genetics* 2016, 18:1282-1289.



- 247 2. Bean LJH, Funke B, Carlston CM, Gannon JL, Kantarci S, Krock BL, Zhang S, Bayrak-Toydemir P,  
248 Committee ALQA: Diagnostic gene sequencing panels: from design to report-a technical standard of the  
249 American College of Medical Genetics and Genomics (ACMG). *Genetics in medicine : official journal of*  
250 *the American College of Medical Genetics* 2020, 22:453-461.
- 251 3. Rehm HL, Berg JS, Brooks LD, Bustamante CD, Evans JP, Landrum MJ, Ledbetter DH, Maglott DR, Martin  
252 CL, Nussbaum RL, Plon SE, Ramos EM, Sherry ST, Watson MS, ClinGen: ClinGen--the Clinical Genome  
253 Resource. *The New England journal of medicine* 2015, 372:2235-2242.
- 254 4. Clinical and Laboratory Standards Institute: MM17 Validation and Verification of Multiplex Nucleic Acid  
255 Assays, 2nd ed. Wayne, PA: Clinical and Laboratory Standards Institute, 2018.
- 256 5. Zook JM, Catoe D, McDaniel J, Vang L, Spies N, Sidow A, Weng Z, Liu Y, Mason CE, Alexander N, Henaff E,  
257 McIntyre ABR, Chandramohan D, Chen F, Jaeger E, Moshrefi A, Pham K, Stedman W, Liang T, Saghbini M,  
258 Dzakula Z, Hastie A, Cao H, Deikus G, Schadt E, Sebra R, Bashir A, Truty RM, Chang CC, Gulbahce N, Zhao  
259 K, Ghosh S, Hyland F, Fu Y, Chaisson M, Xiao C, Trow J, Sherry ST, Zaranek AW, Ball M, Bobe J, Estep P,  
260 Church GM, Marks P, Kyriazopoulou-Panagiotopoulou S, Zheng GXY, Schnall-Levin M, Ordonez HS,  
261 Mudivarti PA, Giorda K, Sheng Y, Rypdal KB, Salit M: Extensive sequencing of seven human genomes to  
262 characterize benchmark reference materials. *Scientific Data* 2016, 3:160025.
- 263 6. Wang Y-C, Olson ND, Deikus G, Shah H, Wenger AM, Trow J, Xiao C, Sherry S, Salit ML, Zook JM, Smith M,  
264 Sebra R: High-coverage, long-read sequencing of Han Chinese trio reference samples. *Scientific Data*  
265 2019, 6:91.
- 266 7. Zook JM, McDaniel J, Olson ND, Wagner J, Parikh H, Heaton H, Irvine SA, Trigg L, Truty R, McLean CY, De  
267 La Vega FM, Xiao C, Sherry S, Salit M: An open resource for accurately benchmarking small variant and  
268 reference calls. *Nature biotechnology* 2019, 37:561-566.
- 269 8. Eberle MA, Fritzilas E, Krusche P, Kallberg M, Moore BL, Bekritsky MA, Iqbal Z, Chuang HY, Humphray SJ,  
270 Halpern AL, Kruglyak S, Margulies EH, McVean G, Bentley DR: A reference data set of 5.4 million phased  
271 human variants validated by genetic inheritance from sequencing a three-generation 17-member  
272 pedigree. *Genome Res* 2017, 27:157-164.
- 273 9. Duncavage EJ, Abel HJ, Pfeifer JD: In Silico Proficiency Testing for Clinical Next-Generation Sequencing.  
274 *The Journal of molecular diagnostics : JMD* 2017, 19:35-42.
- 275 10. Duncavage EJ, Abel HJ, Merker JD, Bodner JB, Zhao Q, Voelkerding KV, Pfeifer JD: A Model Study of In  
276 Silico Proficiency Testing for Clinical Next-Generation Sequencing. *Archives of pathology & laboratory*  
277 *medicine* 2016, 140:1085-1091.
- 278 11. Li Z, Fang S, Zhang R, Yu L, Zhang J, Bu D, Sun L, Zhao Y, Li J: VarBen: Generating in Silico Reference Data  
279 Sets for Clinical Next-Generation Sequencing Bioinformatics Pipeline Evaluation. *The Journal of*  
280 *molecular diagnostics : JMD* 2021, 23:285-299.
- 281 12. Kalia SS, Adelman K, Bale SJ, Chung WK, Eng C, Evans JP, Herman GE, Hufnagel SB, Klein TE, Korf BR,  
282 McKelvey KD, Ormond KE, Richards CS, Vlangos CN, Watson M, Martin CL, Miller DT, on behalf of the  
283 ASFMWG: Recommendations for reporting of secondary findings in clinical exome and genome  
284 sequencing, 2016 update (ACMG SF v2.0): a policy statement of the American College of Medical  
285 Genetics and Genomics. *Genetics in Medicine* 2017, 19:249-255.
- 286 13. Chen B, Gagnon M, Shahangian S, Anderson NL, Howerton DA, Boone JD, Centers for Disease C,  
287 Prevention: Good laboratory practices for molecular genetic testing for heritable diseases and  
288 conditions. *MMWR Recommendations and reports : Morbidity and mortality weekly report*  
289 *Recommendations and reports / Centers for Disease Control* 2009, 58:1-37; quiz CE-31-34.
- 290 14. Association for Molecular Pathology statement. Recommendations for in-house development and  
291 operation of molecular diagnostic tests. *Am J Clin Pathol* 1999, 111:449-463.
- 292 15. International Organization for Standardization: ISO 15189 Medical Laboratories: Requirements for  
293 Quality and Competence. Geneva. International Organization for Standardization 2012.
- 294 16. Electronic Code of Federal Regulations: The Clinical Laboratory Improvement Amendments (CLIA). Title  
295 42 Chapter IV, Subchapter G, Part 493.

- 296 17. Aziz N, Zhao Q, Bry L, Driscoll DK, Funke B, Gibson JS, Grody WW, Hegde MR, Hoeltge GA, Leonard DG,  
297 Merker JD, Nagarajan R, Palicki LA, Robetorye RS, Schrijver I, Weck KE, Voelkerding KV: College of  
298 American Pathologists' laboratory standards for next-generation sequencing clinical tests. Archives of  
299 pathology & laboratory medicine 2015, 139:481-493.
- 300 18. Roy S, Coldren C, Karunamurthy A, Kip NS, Klee EW, Lincoln SE, Leon A, Pullambhatla M, Temple-Smolkin  
301 RL, Voelkerding KV, Wang C, Carter AB: Standards and Guidelines for Validating Next-Generation  
302 Sequencing Bioinformatics Pipelines: A Joint Recommendation of the Association for Molecular  
303 Pathology and the College of American Pathologists. The Journal of molecular diagnostics : JMD 2018,  
304 20:4-27.
- 305 19. Santani A, Simen BB, Briggs M, Lebo M, Merker JD, Nikiforova M, Vasalos P, Voelkerding K, Pfeifer J,  
306 Funke B: Designing and Implementing NGS Tests for Inherited Disorders: A Practical Framework with  
307 Step-by-Step Guidance for Clinical Laboratories. The Journal of molecular diagnostics : JMD 2019,  
308 21:369-374.
- 309 20. Patil SA, Mujacic I, Ritterhouse LL, Segal JP, Kadri S: insiM: in silico Mutator Software for Bioinformatics  
310 Pipeline Validation of Clinical Next-Generation Sequencing Assays. The Journal of molecular diagnostics :  
311 JMD 2019, 21:19-26.
- 312
